# Supplementary material for: Molecular Phylogenetic Analysis of Salt-Tolerance-Related Genes in Root-Nodule Bacteria Species Sinorhizobium meliloti
Source: MDPI journal article supplement (doi:10.3390/agronomy12081968), 2022-08-20
Supplement: s1 [file s1]

**Table S1.** List of genes, detected in the genomes of bacterial strains.

| Class                    | Genera               | species            | strain               | BioSample        | <i>trk</i><br><i>A</i> | <i>trk</i><br><i>H</i> | <i>trk</i><br><i>H-2</i> | <i>kd</i><br><i>pA</i> | <i>aqp</i><br><i>Z1</i> | <i>aqp</i><br><i>Z2</i> | <i>be</i><br><i>tI</i> | <i>betI</i><br><i>-2</i> | <i>bet</i><br><i>A</i> | <i>bet</i><br><i>A-2</i> | <i>bet</i><br><i>B</i> | <i>bet</i><br><i>B2</i> | <i>bet</i><br><i>C</i> |
|--------------------------|----------------------|--------------------|----------------------|------------------|------------------------|------------------------|--------------------------|------------------------|-------------------------|-------------------------|------------------------|--------------------------|------------------------|--------------------------|------------------------|-------------------------|------------------------|
| $\alpha$ -proteobacteria | <i>Sinorhizobium</i> | <i>S. meliloti</i> | Rm1021               | SAMEA328<br>3068 | 1                      | 1                      | 1                        | 1                      | 1                       | 1                       | 1                      | 1                        | 1                      |                          | 1                      | 1                       | 1                      |
|                          |                      |                    | Rm2011               | SAMN0260<br>3522 | 1                      | 1                      | 1                        | 1                      | 1                       | 1                       | 1                      | 1                        | 1                      |                          | 1                      | 1                       | 1                      |
|                          |                      |                    | USDA1106             | SAMN0717<br>5168 | 1                      |                        |                          | 1                      |                         | 1                       | 1                      | 1                        | 1                      |                          | 1                      | 1                       | 1                      |
|                          |                      |                    | USDA1157             | SAMN0717<br>5169 | 1                      |                        |                          | 1                      |                         | 1                       | 1                      | 1                        | 1                      |                          | 1                      | 1                       | 1                      |
|                          |                      |                    | USDA1021             | SAMN0717<br>5167 | 1                      |                        |                          | 1                      | 1                       |                         | 1                      | 1                        | 1                      |                          | 1                      | 1                       | 1                      |
|                          |                      |                    | B399                 | SAMN0622<br>9775 | 1                      |                        |                          | 1                      | 1                       | 1                       | 1                      | 1                        | 1                      |                          | 1                      | 1                       | 1                      |
|                          |                      |                    | B401                 | SAMN0622<br>7501 | 1                      | 1                      |                          | 1                      | 1                       | 1                       | 1                      | 1                        | 1                      |                          | 1                      | 1                       | 1                      |
|                          |                      |                    | BL225C               | SAMN0001<br>7103 | 1                      | 1                      | 1                        | 1                      | 1                       | 1                       | 1                      | 1                        | 1                      |                          | 1                      | 1                       | 1                      |
|                          |                      |                    | CCMMB554<br>(FSM-MA) | SAMN0628<br>4128 | 1                      | 1                      | 1                        | 1                      | 1                       | 1                       | 1                      | 1                        | 1                      |                          | 1                      | 1                       | 1                      |
|                          |                      |                    | GR4                  | SAMN0260<br>3224 | 1                      | 1                      |                          | 1                      | 1                       | 1                       | 1                      | 1                        | 1                      |                          | 1                      | 1                       | 1                      |
|                          |                      |                    | KH35c                | SAMN0717<br>5161 | 1                      |                        |                          | 1                      | 1                       |                         | 1                      | 1                        | 1                      |                          | 1                      | 1                       | 1                      |
|                          |                      |                    | KH46                 | SAMN0717<br>5162 | 1                      |                        |                          | 1                      |                         |                         | 1                      | 1                        | 1                      |                          | 1                      | 1                       | 1                      |
|                          |                      |                    | HM006                | SAMN0717<br>5160 | 1                      |                        |                          | 1                      |                         | 1                       | 1                      | 1                        | 1                      |                          | 1                      | 1                       | 1                      |
|                          |                      |                    | M162                 | SAMN0717<br>5163 | 1                      |                        |                          | 1                      | 1                       | 1                       | 1                      | 1                        | 1                      |                          | 1                      | 1                       | 1                      |

|                       |                   |          |                   |   |   |   |   |   |   |   |   |   |   |   |   |   |
|-----------------------|-------------------|----------|-------------------|---|---|---|---|---|---|---|---|---|---|---|---|---|
|                       |                   | M270     | SAMN0717<br>5164  | 1 |   |   | 1 | 1 |   | 1 | 1 | 1 |   | 1 | 1 | 1 |
|                       |                   | Rm41     | SAMN0717<br>5165  | 1 |   |   | 1 | 1 | 1 | 1 | 1 | 1 |   | 1 | 1 | 1 |
|                       |                   | RMO17    | SAMN0295<br>2139  | 1 | 1 | 1 | 1 | 1 | 1 | 1 | 1 | 1 |   | 1 | 1 | 1 |
|                       |                   | RU11/001 | SAMEA314<br>6337  | 1 | 1 | 1 | 1 | 1 | 1 | 1 | 1 | 1 |   | 1 | 1 | 1 |
|                       |                   | SM11     | ,SAMN026<br>03056 | 1 | 1 | 1 | 1 | 1 | 1 | 1 | 1 | 1 |   | 1 | 1 | 1 |
|                       |                   | T073     | SAMN0717<br>5166  | 1 |   |   | 1 | 1 |   | 1 | 1 | 1 |   | 1 | 1 | 1 |
|                       |                   | AK83     | SAMN0001<br>7059  | 1 | 1 | 1 | 1 |   |   | 1 | 1 | 1 |   | 1 | 1 | 1 |
|                       |                   | AK21     | SAMN0842<br>8886  | 1 | 1 | 1 | 1 | 1 | 1 | 1 | 1 | 1 |   | 1 | 1 | 1 |
|                       |                   | AK555    | SAMN0882<br>6593  | 1 | 1 |   | 1 | 1 |   | 1 | 1 | 1 | 1 | 1 | 1 | 1 |
|                       |                   | AK170    | SAMN1025<br>6575  | 1 | 1 |   | 1 | 1 |   | 1 | 1 | 1 | 1 | 1 | 1 | 1 |
|                       |                   | S35m     | SAMN1681<br>2329  | 1 | 1 |   |   | 1 | 1 | 1 | 1 | 1 | 1 | 1 | 1 | 1 |
|                       |                   | CXM1-105 | SAMN0882<br>6592  |   | 1 |   | 1 | 1 | 1 | 1 | 1 | 1 | 1 | 1 | 1 | 1 |
| <i>Bradyrhizobium</i> | <i>S. medicae</i> | WSM419   | SAMN0259<br>8363  | 1 | 1 | 1 | 1 | 1 |   | 1 |   | 1 |   | 1 |   | 1 |
|                       | <i>Brad. spp.</i> | GAS369   | NZ_LT629<br>750.1 |   |   |   | 1 | 1 |   |   |   |   |   |   |   |   |
|                       |                   | ORS 278  | SAMEA313<br>8227  |   |   |   | 1 |   |   |   |   |   |   |   |   |   |
|                       |                   | USDA 6   | SAMD0006<br>0992  |   |   |   | 1 | 1 |   |   |   |   |   |   |   |   |

|                          |                                     |                                                  |           |                  |   |   |   |   |   |   |   |   |   |   |   |   |
|--------------------------|-------------------------------------|--------------------------------------------------|-----------|------------------|---|---|---|---|---|---|---|---|---|---|---|---|
|                          |                                     |                                                  | USDA 110  | SAMN0357<br>3437 |   |   | 1 | 1 |   |   |   |   |   |   |   |   |
|                          | <i>Brucella</i>                     | <i>Bruc. melitensis</i> bv.<br><i>abortus</i>    | 2308      | SAMEA313<br>8256 | 1 | 1 |   | 1 |   | 1 |   |   | 1 |   |   |   |
|                          | <i>Devosia</i>                      | <i>D. sp.</i>                                    | A16       | SAMN0415<br>6589 |   |   | 1 | 1 |   |   |   |   |   |   |   |   |
|                          | <i>Chelativora</i><br><i>ns</i>     | <i>Chel. sp.</i>                                 | BNC1      | SAMN0259<br>8260 | 1 | 1 |   |   |   |   |   |   |   |   |   |   |
|                          | <i>Agrobacteri</i><br><i>um</i>     | <i>A. fabrum</i>                                 | C58       | SAMN0260<br>3108 | 1 | 1 |   | 1 | 1 | 1 | 1 |   | 1 |   | 1 |   |
|                          | <i>Rhizobium</i>                    | <i>Rh. etli</i>                                  | CFN 42    | SAMN0260<br>3106 |   |   | 1 |   |   | 1 |   | 1 |   | 1 |   | 1 |
|                          | <i>Azorhizobiu</i><br><i>m</i>      | <i>Azor. caulinodans</i>                         | ORS 571   | SAMD0006<br>0925 | 1 | 2 |   | 1 |   |   |   | 1 |   | 1 |   |   |
|                          | <i>Gluconaceto</i><br><i>bacter</i> | <i>Gluc. diazotrophicus</i>                      | PA1 5     | SAMN0259<br>8444 |   |   |   |   |   |   |   |   |   |   |   |   |
|                          | <i>Azospirillu</i><br><i>m</i>      | <i>Azo. sp.</i>                                  | B510      | SAMD0006<br>0958 |   |   | 1 |   |   | 1 |   | 1 |   | 1 |   |   |
| β-<br>proteobact<br>eria | <i>Cupriavidus</i>                  | <i>Cupr. taiwanensis</i>                         | LMG 19424 | SAMEA313<br>8280 |   |   | 1 |   |   |   | 1 |   |   |   |   |   |
|                          | <i>Azoarcus</i>                     | <i>A. olearius</i>                               | BH72      | SAMEA313<br>8261 | 1 |   |   |   |   |   |   |   |   |   |   |   |
| γ-<br>proteobact<br>eria | <i>Klebsiella</i>                   | <i>K. pneumoniae</i> subsp.<br><i>pneumoniae</i> | HS11286   | SAMN0260<br>2959 |   |   | 1 | 1 |   | 1 |   |   |   | 1 |   |   |
|                          | <i>Escherichia</i>                  | <i>E. coli</i>                                   | K-12      | SAMN0260<br>4091 | 1 |   | 1 | 1 |   | 1 |   | 1 |   | 1 |   |   |
| <i>Actinobacteria</i>    | <i>Frankia</i>                      | <i>F. spp.</i>                                   | ACN14a    | SAMEA313<br>8259 |   |   | 2 |   |   |   |   |   |   |   |   |   |
|                          |                                     |                                                  | EAN1Pec   | SAMN0259<br>8325 |   |   | 1 |   |   |   |   |   |   |   |   |   |
|                          |                                     |                                                  | Ccl3      | SAMN0219<br>9398 |   |   | 1 |   |   |   |   |   |   |   |   |   |

|                        |                        |              |                   |  |   |   |   |
|------------------------|------------------------|--------------|-------------------|--|---|---|---|
| <i>Corynebacterium</i> | <i>Cor. glutamicum</i> | ATCC 13032   | SAMD0006<br>1105  |  |   |   |   |
| <i>Mycobacterium</i>   | <i>M. smegmatis</i>    | MC2 155      | NZ_LN831<br>039.1 |  | 1 | 1 |   |
| <i>Mycobacterium</i>   | <i>M. spp.</i>         | H37Rv        | SAMEA313<br>8326  |  | 1 |   |   |
|                        |                        | AF2122/97    | SAMEA204<br>50668 |  | 1 |   | 1 |
| <i>Pimelobacter</i>    | <i>P. simplex</i>      | VKM Ac-2033D | SAMN0300<br>9415  |  | 1 |   |   |

1 – one copy of gene, 2 – two copies of genes, the filled cell – no genes found.
